# Supplementary material for: A dataset of sea turtle occurrences around the Taiwan coast
Source: Biodivers Data J. 2022 Nov 3;10:e90196. doi: 10.3897/BDJ.10.e90196 (PMC9836535; doi:10.3897/BDJ.10.e90196)
Supplement: Supplementary material 1 — Controlled vocabulary describing additional information about the occurrence [file bdj-10-e90196-s001.csv]

dwc:scientificName	dwc:vernacularName	dwc:behavior	dwc:occurrenceRemarks	dwc:associatedTaxa	dwc:lifeStage	dwc:sex	dwc:dynamicProperties
Chelonia mydas	Green turtle	Feeding	Alive	"Intraspecies interaction"	Adult	Male	{"Abnormality":"Carapace injury"}
Eretmochelys imbricata	Hawksbill	Resting	Dead stranded	"Feeds on":"Jellyfish"	Sub-adult	Female	{"Abnormality":"Limb injury"}
Caretta caretta	Loggerhead	Cleaning	Alive stranded	"Feeds on":"Tunicate"	Juvenile	Unknown	{"Abnormality":"FP Tumor"}
Lepidochelys olivacea	Olive Ridley	Swimming	Captive	"Epibiont":"Algae"	Hatchling		{"Abnormality":"Fishing line entanglement"}
Dermochelys coriacea	Leatherback	Breathing	Floating	"Epibiont":"Barnacle"	Unknown		{"Abnormality":"Others"}
Cheloniidae	Sea turtle	Crawling	Dead	"Symbiosis":"Remora fish"
Natator depressus	Flatback	Mating (or attempt)		"Symbiosis":"Cleaning fish"
Lepidochelys kempii	Kemp's Ridley	Territoriality		Others
		Unknown
		Others
